# Supplementary material for: Safety, Tolerability, Pharmacokinetics, and Pharmacodynamics of Coadministered Ruxolitinib and Artemether-Lumefantrine in Healthy Adults
Source: PubMed Central journal article supplement (PMC8765294; doi:10.1128/aac.01584-21), 2022-01-18
Supplement: aac.01584-21-s0001.pdf [file aac.01584-21-s0001.pdf]

## Supplementary material for

### Safety, Tolerability, Pharmacokinetics and Pharmacodynamics of Co-administered Ruxolitinib and Artemether-Lumefantrine in Healthy Adults

M. Farouk Chughlay,<sup>a</sup> # Karen I. Barnes,<sup>b</sup> Myriam El Gaaloul,<sup>a</sup> Nada Abla,<sup>a</sup> Jörg J Möhrle,<sup>a</sup> Paul Griffin,<sup>c,d,e,f</sup> Paul van Giersbergen,<sup>g</sup> Stephanie E Reuter,<sup>h</sup> Hayley B. Schultz,<sup>h</sup> Anita Kress,<sup>i</sup> Peter Tapley,<sup>j</sup> Rebecca A. Webster,<sup>c</sup> Timothy Wells,<sup>a</sup> James S. McCarthy,<sup>c,e</sup> Bridget E. Barber,<sup>c</sup> Louise Marquart,<sup>c</sup> Michelle J. Boyle,<sup>c</sup> Christian R. Engwerda,<sup>c</sup> Stephan Chalon<sup>a</sup>

<sup>a</sup>Medicines for Malaria Venture, Geneva, Switzerland

<sup>b</sup>Division of Clinical Pharmacology, Department of Medicine, University of Cape Town, Cape Town, South Africa

<sup>c</sup>QIMR Berghofer Medical Research Institute, Brisbane, Queensland Australia

<sup>d</sup>Q-Pharm Pty Ltd, Herston, Queensland, Australia

<sup>e</sup>University of Queensland, Brisbane, Queensland, Australia

<sup>f</sup>Mater Health Services, South Brisbane, Queensland, Australia

<sup>g</sup>Van Giersbergen Consulting, Wuenheim, France

<sup>h</sup>UniSA Clinical and Health Sciences, University of South Australia, Adelaide, South Australia, Australia

<sup>i</sup>Swiss BioQuant, Reinach, Switzerland

<sup>j</sup>TetraQ, Brisbane, Queensland, Australia

#Corresponding author.

## Contents

|                                                                                                                                                                                                                                                                                                                                                                                                                                                                                            |    |
|--------------------------------------------------------------------------------------------------------------------------------------------------------------------------------------------------------------------------------------------------------------------------------------------------------------------------------------------------------------------------------------------------------------------------------------------------------------------------------------------|----|
| <b>Table S1</b> Out of normal range values for hematology, clinical chemistry, and urinalysis relative to screening and baseline (day -1).....                                                                                                                                                                                                                                                                                                                                             | 3  |
| <b>Figure S1</b> Individual participant values for Fridericia-corrected QT (QTcF).....                                                                                                                                                                                                                                                                                                                                                                                                     | 6  |
| <b>Table S2</b> Post-hoc analysis comparing the change over time in $T_{\max}$ and $C_{\max}$ parameters within each treatment group assessed using Wilcoxon signed-rank test for $T_{\max}$ or paired t-test of the $\log_{10}$ transformed $C_{\max}$ parameter, and summarized either as median (range) for $T_{\max}$ or as the ratio of day 3 relative to day 1 presented as a percent and 95% confidence interval for $C_{\max}$ (relative change).....                              | 7  |
| <b>Table S3</b> Post-hoc analysis comparing pharmacokinetic parameters for artemether, dihydroartemisinin as an artemether metabolite, and lumefantrine following administration of artemether-lumefantrine with or without ruxolitinib. Differences between treatment groups were assessed using either the Kruskal-Wallis for $T_{\max}$ , or two-sample t-test for $\log_{10}$ -transformed $C_{\max}$ , AUC, and half-life parameters.....                                             | 8  |
| <b>Table S4</b> Post-hoc analysis comparing ruxolitinib pharmacokinetic parameters for the artemether-lumefantrine plus ruxolitinib group ( $n = 6$ ) between day 1 and day 3. Differences over the two time-points were compared non-parametrically using Wilcoxon signed-rank test, and differences of the $\log_{10}$ parameters were compared using a paired t-test and summarized as the ratio of day 3 relative to day 1 and presented as a percent and 95% confidence interval..... | 10 |

**Table S1** Out of normal range values for hematology, clinical chemistry, and urinalysis relative to screening and baseline (day -1).

| Parameter (unit) Visit                |           | Artemether-lumefantrine plus ruxolitinib (n = 6) |                 |       |       |      |      |                        |          |          | Artemether-lumefantrine plus placebo (n = 2) |                 |       |        |      |       |                        |          |          |
|---------------------------------------|-----------|--------------------------------------------------|-----------------|-------|-------|------|------|------------------------|----------|----------|----------------------------------------------|-----------------|-------|--------|------|-------|------------------------|----------|----------|
|                                       |           | n                                                | Absolute values |       |       |      |      | Reference range, n (%) |          |          | n                                            | Absolute values |       |        |      |       | Reference range, n (%) |          |          |
|                                       |           |                                                  | Mean            | SD    | Media | Min  | Max  | Low                    | Normal   | High     |                                              | Mean            | SD    | Median | Min  | Max   | Low                    | Normal   | High     |
|                                       |           |                                                  | n               |       |       |      |      |                        |          |          |                                              |                 |       |        |      |       |                        |          |          |
| Eosinophils<br>(10 <sup>9</sup> /L)   | Screening | 6                                                | 0.150           | 0.105 | 0.144 | 0.03 | 0.43 | 1 (16.7)               | 5 (83.3) | 0        | 2                                            | 0.260           | 0.260 | 0.226  | 0.10 | 0.42  | 0                      | 2 (100)  | 0        |
|                                       | Day -1    | 6                                                | 0.088           | 0.070 | 0.077 | 0.02 | 0.24 | 1 (16.7)               | 5 (83.3) | 0        | 2                                            | 0.300           | 0.300 | 0.198  | 0.16 | 0.44  | 0                      | 2 (100)  | 0        |
|                                       | Day 2     | 6                                                | 0.103           | 0.090 | 0.062 | 0.03 | 0.19 | 1 (16.7)               | 5 (83.3) | 0        | 2                                            | 0.310           | 0.310 | 0.283  | 0.11 | 0.51  | 0                      | 1 (50.0) | 1 (50.0) |
|                                       | Day 3     | 6                                                | 0.100           | 0.110 | 0.047 | 0.03 | 0.15 | 1 (16.7)               | 5 (83.3) | 0        | 2                                            | 0.305           | 0.305 | 0.219  | 0.15 | 0.46  | 0                      | 2 (100)  | 0        |
|                                       | Day 8     | 6                                                | 0.135           | 0.110 | 0.117 | 0.01 | 0.35 | 1 (16.7)               | 5 (83.3) | 0        | 2                                            | 0.325           | 0.325 | 0.290  | 0.12 | 0.53  | 0                      | 1 (50.0) | 1 (50.0) |
|                                       | Day 29    | 5                                                | 0.176           | 0.130 | 0.162 | 0.03 | 0.44 | 1 (16.7)               | 4 (66.7) | 0        | 2                                            | 0.320           | 0.320 | 0.226  | 0.16 | 0.48  | 0                      | 2 (100)  | 0        |
| Hemoglobin (g/L)                      | Screening | 6                                                | 141.3           | 139.5 | 6.9   | 135  | 153  | 0                      | 6 (100)  | 0        | 2                                            | 142.0           | 142.0 | 14.1   | 132  | 152   | 0                      | 2 (100)  | 0        |
|                                       | Day -1    | 6                                                | 142.0           | 142.5 | 7.8   | 133  | 155  | 0                      | 6 (100)  | 0        | 2                                            | 143.0           | 143.0 | 12.7   | 134  | 152   | 0                      | 2 (100)  | 0        |
|                                       | Day 8     | 6                                                | 134.3           | 134.5 | 12.4  | 113  | 149  | 1 (16.7)               | 5 (83.3) | 0        | 2                                            | 143.0           | 143.0 | 12.7   | 134  | 152   | 0                      | 2 (100)  | 0        |
| Lymphocytes<br>(10 <sup>9</sup> /L)   | Screening | 6                                                | 2.345           | 1.945 | 0.912 | 1.67 | 4.04 | 0                      | 5 (83.3) | 1 (16.7) | 2                                            | 2.310           | 2.310 | 0.721  | 1.80 | 2.82  | 0                      | 2 (100)  | 0        |
|                                       | Day -1    | 6                                                | 2.498           | 2.445 | 0.874 | 1.55 | 3.88 | 0                      | 6 (100)  | 0        | 2                                            | 2.390           | 2.390 | 0.820  | 1.81 | 2.97  | 0                      | 2 (100)  | 0        |
|                                       | Day 15    | 4                                                | 2.633           | 2.260 | 1.119 | 1.74 | 4.27 | 0                      | 3 (50.0) | 1 (16.7) | 2                                            | 1.810           | 1.810 | 0.184  | 1.68 | 1.94  | 0                      | 2 (100)  | 0        |
| Neutrophils<br>(10 <sup>9</sup> /L)   | Screening | 6                                                | 4.735           | 5.385 | 1.474 | 1.87 | 5.82 | 0                      | 6 (100)  | 0        | 2                                            | 5.025           | 5.025 | 3.415  | 2.61 | 7.44  | 0                      | 2 (100)  | 0        |
|                                       | Day -1    | 6                                                | 5.005           | 5.060 | 1.074 | 3.09 | 6.20 | 0                      | 6 (100)  | 0        | 2                                            | 6.555           | 6.555 | 0.346  | 6.31 | 6.80  | 0                      | 2 (100)  | 0        |
|                                       | Day 2     | 6                                                | 3.303           | 2.855 | 1.330 | 1.77 | 5.09 | 1 (16.7)               | 5 (83.3) | 0        | 2                                            | 3.960           | 3.960 | 1.259  | 3.07 | 4.85  | 0                      | 2 (100)  | 0        |
| Erythrocytes<br>(10 <sup>12</sup> /L) | Day 3     | 6                                                | 2.590           | 2.265 | 1.208 | 1.42 | 4.93 | 1 (16.7)               | 5 (83.3) | 0        | 2                                            | 3.375           | 3.375 | 0.856  | 2.77 | 3.98  | 0                      | 2 (100)  | 0        |
|                                       | Screening | 6                                                | 4.562           | 4.525 | 0.364 | 4.18 | 5.20 | 0                      | 6 (100)  | 0        | 2                                            | 4.600           | 4.600 | 0.495  | 4.25 | 4.95  | 0                      | 2 (100)  | 0        |
|                                       | Day -1    | 6                                                | 4.602           | 4.565 | 0.310 | 4.17 | 4.95 | 0                      | 6 (100)  | 0        | 2                                            | 4.620           | 4.620 | 0.339  | 4.38 | 4.86  | 0                      | 2 (100)  | 0        |
| Reticulocytes<br>(10 <sup>9</sup> /L) | Day 8     | 6                                                | 4.350           | 4.335 | 0.447 | 3.75 | 5.05 | 1 (16.7)               | 5 (83.3) | 0        | 2                                            | 4.635           | 4.635 | 0.375  | 4.37 | 4.90  | 0                      | 2 (100)  | 0        |
|                                       | Screening | 6                                                | 58.95           | 56.70 | 18.30 | 39.3 | 92.6 | 0                      | 6 (100)  | 0        | 2                                            | 69.25           | 69.25 | 9.55   | 62.5 | 76.0  | 0                      | 2 (100)  | 0        |
|                                       | Day -1    | 6                                                | 57.28           | 52.95 | 13.12 | 47.5 | 82.7 | 0                      | 6 (100)  | 0        | 2                                            | 66.95           | 66.95 | 9.83   | 60.0 | 73.9  | 0                      | 2 (100)  | 0        |
| Leukocytes<br>(10 <sup>9</sup> /L)    | Day 8     | 6                                                | 60.92           | 59.45 | 22.42 | 26.3 | 91.9 | 0                      | 6 (100)  | 0        | 2                                            | 85.95           | 85.95 | 23.26  | 69.5 | 102.4 | 0                      | 1 (50.0) | 1 (50.0) |
|                                       | Screening | 6                                                | 7.90            | 8.35  | 1.88  | 4.3  | 9.5  | 0                      | 6 (100)  | 0        | 2                                            | 8.15            | 8.15  | 4.03   | 5.3  | 11.0  | 0                      | 2 (100)  | 0        |
|                                       | Day -1    | 6                                                | 8.22            | 8.15  | 1.41  | 6.6  | 9.8  | 0                      | 6 (100)  | 0        | 2                                            | 9.95            | 9.95  | 0.35   | 9.7  | 10.2  | 0                      | 2 (100)  | 0        |
| Albumin (g/L)                         | Day 8     | 6                                                | 6.73            | 7.05  | 1.87  | 3.9  | 8.7  | 1 (16.7)               | 5 (83.3) | 0        | 2                                            | 6.65            | 6.65  | 1.06   | 5.9  | 7.4   | 0                      | 2 (100)  | 0        |
|                                       | Screening | 6                                                | 46.7            | 46.5  | 4.0   | 43   | 54   | 0                      | 5 (83.3) | 1 (16.7) | 2                                            | 40.0            | 40.0  | 2.8    | 38   | 42    | 0                      | 2 (100)  | 0        |
|                                       | Day -1    | 6                                                | 43.3            | 42.5  | 3.4   | 40   | 50   | 0                      | 5 (83.3) | 1 (16.7) | 2                                            | 42.0            | 42.0  | 4.2    | 39   | 45    | 0                      | 2 (100)  | 0        |
|                                       | Day 2     | 6                                                | 40.0            | 40.0  | 0.9   | 39   | 41   | 0                      | 6 (100)  | 0        | 2                                            | 37.0            | 37.0  | 9.9    | 30   | 44    | 1 (50.0)               | 1 (50.0) | 0        |

| Parameter (unit) Visit     | Artemether-lumefantrine plus ruxolitinib (n = 6) |                 |       |       |       |      |                        |          |          |          | Artemether-lumefantrine plus placebo (n = 2) |                 |        |       |      |      |                        |          |          |  |
|----------------------------|--------------------------------------------------|-----------------|-------|-------|-------|------|------------------------|----------|----------|----------|----------------------------------------------|-----------------|--------|-------|------|------|------------------------|----------|----------|--|
|                            | n                                                | Absolute values |       |       |       |      | Reference range, n (%) |          |          |          | n                                            | Absolute values |        |       |      |      | Reference range, n (%) |          |          |  |
|                            |                                                  | Mean            | SD    | Media | Min   | Max  | Low                    | Normal   | High     | Mean     |                                              | SD              | Median | Min   | Max  | Low  | Normal                 | High     |          |  |
|                            |                                                  |                 |       |       |       |      |                        |          |          |          |                                              |                 |        |       |      |      |                        |          |          |  |
| Alkaline phosphatase (U/L) | Day 4                                            | 6               | 42.0  | 41.0  | 3.1   | 39   | 48                     | 0        | 5 (83.3) | 1 (16.7) | 2                                            | 40.0            | 40.0   | 1.4   | 39   | 41   | 0                      | 2 (100)  | 0        |  |
|                            | Day 29                                           | 5               | 41.6  | 41.0  | 3.7   | 39   | 48                     | 0        | 4 (66.7) | 1 (16.7) | 2                                            | 41.0            | 41.0   | 2.8   | 39   | 43   | 0                      | 2 (100)  | 0        |  |
|                            | Screening                                        | 6               | 61.3  | 64.5  | 8.8   | 49   | 71                     | 0        | 6 (100)  | 0        | 2                                            | 46.5            | 46.5   | 2.1   | 45   | 48   | 0                      | 2 (100)  | 0        |  |
|                            | Day -1                                           | 6               | 55.2  | 57.0  | 9.6   | 42   | 66                     | 0        | 6 (100)  | 0        | 2                                            | 51.5            | 51.5   | 9.2   | 45   | 58   | 0                      | 2 (100)  | 0        |  |
|                            | Day 2                                            | 6               | 48.0  | 51.5  | 8.5   | 33   | 56                     | 1 (16.7) | 5 (83.3) | 0        | 2                                            | 41.5            | 41.5   | 20.5  | 27   | 56   | 1 (50.0)               | 1 (50.0) | 0        |  |
| Bicarbonate (mmol/L)       | Day 4                                            | 6               | 47.7  | 51.0  | 9.7   | 31   | 57                     | 1 (16.7) | 5 (83.3) | 0        | 2                                            | 50.0            | 50.0   | 1.4   | 49   | 51   | 0                      | 2 (100)  | 0        |  |
|                            | Screening                                        | 6               | 27.7  | 27.5  | 2.7   | 25   | 32                     | 0        | 6 (100)  | 0        | 2                                            | 28.5            | 28.5   | 3.5   | 26   | 31   | 0                      | 2 (100)  | 0        |  |
|                            | Day -1                                           | 6               | 28.5  | 28.0  | 2.2   | 26   | 32                     | 0        | 6 (100)  | 0        | 2                                            | 28.5            | 28.5   | 3.5   | 26   | 31   | 0                      | 2 (100)  | 0        |  |
|                            | Day 2                                            | 6               | 26.3  | 27.0  | 2.5   | 23   | 30                     | 0        | 6 (100)  | 0        | 2                                            | 25.0            | 25.0   | 7.1   | 20   | 30   | 1 (50.0)               | 1 (50.0) | 0        |  |
| Direct bilirubin (µmol/L)  | Day 8                                            | 6               | 27.3  | 26.5  | 2.9   | 25   | 33                     | 0        | 5 (83.3) | 1 (16.7) | 2                                            | 29.5            | 29.5   | 3.5   | 27   | 32   | 0                      | 2 (100)  | 0        |  |
|                            | Screening                                        | 6               | 2.5   | 2.5   | 0.5   | 2    | 3                      | 0        | 6 (100)  | 0        | 2                                            | 3.0             | 3.0    | 1.4   | 2    | 4    | 0                      | 2 (100)  | 0        |  |
|                            | Day -1                                           | 6               | 1.5   | 1.5   | 1.4   | 0    | 3                      | 0        | 6 (100)  | 0        | 2                                            | 2.0             | 2.0    | 0.0   | 2    | 2    | 0                      | 2 (100)  | 0        |  |
| Calcium (mmol/L)           | Day 3                                            | 6               | 2.2   | 0.0   | 4.0   | 0    | 10                     | 0        | 5 (83.3) | 1 (16.7) | 2                                            | 1.5             | 1.5    | 0.7   | 1    | 2    | 0                      | 2 (100)  | 0        |  |
|                            | Screening                                        | 6               | 2.432 | 2.435 | 0.063 | 2.36 | 2.54                   | 0        | 6 (100)  | 0        | 2                                            | 2.320           | 2.320  | 0.042 | 2.29 | 2.35 | 0                      | 2 (100)  | 0        |  |
|                            | Day -1                                           | 6               | 2.393 | 2.380 | 0.069 | 2.33 | 2.52                   | 0        | 6 (100)  | 0        | 2                                            | 2.360           | 2.360  | 0.057 | 2.32 | 2.40 | 0                      | 2 (100)  | 0        |  |
| Creatine kinase (U/L)      | Day 2                                            | 6               | 2.288 | 2.270 | 0.043 | 2.26 | 2.37                   | 0        | 6 (100)  | 0        | 2                                            | 2.160           | 2.160  | 0.283 | 1.96 | 2.36 | 1 (50.0)               | 1 (50.0) | 0        |  |
|                            | Screening                                        | 6               | 83.3  | 78.0  | 23.1  | 61   | 128                    | 0        | 6 (100)  | 0        | 2                                            | 76.5            | 76.5   | 6.4   | 72   | 81   | 0                      | 2 (100)  | 0        |  |
|                            | Day -1                                           | 6               | 92.7  | 74.5  | 46.8  | 49   | 175                    | 0        | 6 (100)  | 0        | 2                                            | 78.5            | 78.5   | 9.2   | 72   | 85   | 0                      | 2 (100)  | 0        |  |
|                            | Day 8                                            | 6               | 159.3 | 136.5 | 96.1  | 70   | 335                    | 0        | 4 (66.7) | 2 (33.3) | 2                                            | 78.0            | 78.0   | 21.2  | 63   | 93   | 0                      | 2 (100)  | 0        |  |
|                            | Day 15                                           | 4               | 118.0 | 117.0 | 46.1  | 74   | 164                    | 0        | 3 (50.0) | 1 (16.7) | 2                                            | 77.0            | 77.0   | 18.4  | 64   | 90   | 0                      | 2 (100)  | 0        |  |
| Chloride (mmol/L)          | Day 29                                           | 5               | 118.0 | 88.0  | 60.2  | 70   | 214                    | 0        | 4 (66.7) | 1 (16.7) | 2                                            | 81.5            | 81.5   | 12.0  | 73   | 90   | 0                      | 2 (100)  | 0        |  |
|                            | Screening                                        | 6               | 101.7 | 101.5 | 1.2   | 100  | 103                    | 0        | 6 (100)  | 0        | 2                                            | 103.0           | 103.0  | 1.4   | 102  | 104  | 0                      | 2 (100)  | 0        |  |
|                            | Day -1                                           | 6               | 102.7 | 103.0 | 2.3   | 100  | 105                    | 0        | 6 (100)  | 0        | 2                                            | 102.5           | 102.5  | 2.1   | 101  | 104  | 0                      | 2 (100)  | 0        |  |
| Glucose (mmol/L)           | Day 2                                            | 6               | 104.5 | 105.0 | 1.6   | 102  | 106                    | 0        | 6 (100)  | 0        | 2                                            | 107.0           | 107.0  | 7.1   | 102  | 112  | 0                      | 1 (50.0) | 1 (50.0) |  |
|                            | Screening                                        | 6               | 4.12  | 4.10  | 0.48  | 3.5  | 4.7                    | 0        | 6 (100)  | 0        | 2                                            | 4.10            | 4.10   | 0.42  | 3.8  | 4.4  | 0                      | 2 (100)  | 0        |  |
|                            | Day -1                                           | 6               | 4.28  | 4.30  | 0.43  | 3.6  | 4.7                    | 0        | 6 (100)  | 0        | 2                                            | 4.20            | 4.20   | 0.00  | 4.2  | 4.2  | 0                      | 2 (100)  | 0        |  |
| Potassium (mmol/L)         | Day 29                                           | 5               | 4.86  | 4.40  | 1.18  | 3.9  | 6.9                    | 0        | 4 (66.7) | 1 (16.7) | 2                                            | 4.80            | 4.80   | 0.85  | 4.2  | 5.4  | 0                      | 2 (100)  | 0        |  |
|                            | Screening                                        | 6               | 4.10  | 4.00  | 0.28  | 3.9  | 4.6                    | 0        | 6 (100)  | 0        | 2                                            | 4.25            | 4.25   | 0.07  | 4.2  | 4.3  | 0                      | 2 (100)  | 0        |  |
|                            | Day -1                                           | 6               | 4.30  | 4.30  | 0.35  | 3.8  | 4.8                    | 0        | 6 (100)  | 0        | 2                                            | 4.15            | 4.15   | 0.07  | 4.1  | 4.2  | 0                      | 2 (100)  | 0        |  |
|                            | Day 3                                            | 6               | 4.45  | 4.30  | 0.48  | 4.1  | 5.4                    | 0        | 5 (83.3) | 1 (16.7) | 2                                            | 4.10            | 4.10   | 0.28  | 3.9  | 4.3  | 0                      | 2 (100)  | 0        |  |

| Parameter (unit) Visit              | Artemether-lumefantrine plus ruxolitinib (n = 6) |                 |       |       |       |      |                        |          |          |          | Artemether-lumefantrine plus placebo (n = 2) |                 |        |       |      |      |                        |          |   |
|-------------------------------------|--------------------------------------------------|-----------------|-------|-------|-------|------|------------------------|----------|----------|----------|----------------------------------------------|-----------------|--------|-------|------|------|------------------------|----------|---|
|                                     | n                                                | Absolute values |       |       |       |      | Reference range, n (%) |          |          |          | n                                            | Absolute values |        |       |      |      | Reference range, n (%) |          |   |
|                                     |                                                  | Mean            | SD    | Media | Min   | Max  | Low                    | Normal   | High     | Mean     |                                              | SD              | Median | Min   | Max  | Low  | Normal                 | High     |   |
| Lactate dehydrogenase (U/L)         | Screening                                        | 6               | 146.7 | 151.0 | 16.1  | 119  | 161                    | 1 (16.7) | 5 (83.3) | 0        | 2                                            | 156.0           | 156.0  | 5.7   | 152  | 160  | 0                      | 2 (100)  | 0 |
|                                     | Day -1                                           | 6               | 140.2 | 141.0 | 15.5  | 113  | 156                    | 1 (16.7) | 5 (83.3) | 0        | 2                                            | 160.0           | 160.0  | 22.6  | 144  | 176  | 0                      | 2 (100)  | 0 |
|                                     | Day 2                                            | 6               | 137.5 | 132.0 | 25.2  | 116  | 184                    | 2 (33.3) | 4 (66.7) | 0        | 2                                            | 183.0           | 183.0  | 29.7  | 162  | 204  | 0                      | 2 (100)  | 0 |
|                                     | Day 4                                            | 6               | 133.2 | 132.0 | 18.6  | 114  | 162                    | 2 (33.3) | 4 (66.7) | 0        | 2                                            | 138.5           | 138.5  | 0.7   | 138  | 139  | 0                      | 2 (100)  | 0 |
| LDL cholesterol (mmol/L)            | Screening                                        | 6               | 2.23  | 2.35  | 0.78  | 1.0  | 3.3                    | 1 (16.7) | 4 (66.7) | 1 (16.7) | 2                                            | 2.90            | 2.90   | 0.00  | 2.9  | 2.9  | 0                      | 2 (100)  | 0 |
| Magnesium (mmol/L)                  | Screening                                        | 6               | 0.82  | 0.80  | 0.08  | 0.7  | 0.9                    | 0        | 6 (100)  | 0        | 2                                            | 0.80            | 0.80   | 0.00  | 0.8  | 0.8  | 0                      | 2 (100)  | 0 |
|                                     | Day -1                                           | 6               | 0.78  | 0.80  | 0.04  | 0.7  | 0.8                    | 0        | 6 (100)  | 0        | 2                                            | 0.75            | 0.75   | 0.07  | 0.7  | 0.8  | 0                      | 2 (100)  | 0 |
|                                     | Day 3                                            | 6               | 0.75  | 0.80  | 0.08  | 0.6  | 0.8                    | 1 (16.7) | 5 (83.3) | 0        | 2                                            | 0.75            | 0.75   | 0.07  | 0.7  | 0.8  | 0                      | 2 (100)  | 0 |
| Phosphate (mmol/L)                  | Screening                                        | 6               | 1.218 | 1.180 | 0.118 | 1.07 | 1.38                   | 0        | 6 (100)  | 0        | 2                                            | 1.140           | 1.140  | 0.071 | 1.09 | 1.19 | 0                      | 2 (100)  | 0 |
|                                     | Day -1                                           | 6               | 1.125 | 1.135 | 0.160 | 0.94 | 1.33                   | 0        | 6 (100)  | 0        | 2                                            | 1.230           | 1.230  | 0.028 | 1.21 | 1.25 | 0                      | 2 (100)  | 0 |
|                                     | Day 8                                            | 6               | 1.158 | 1.220 | 0.195 | 0.85 | 1.35                   | 1 (16.7) | 5 (83.3) | 0        | 2                                            | 1.105           | 1.105  | 0.177 | 0.98 | 1.23 | 0                      | 2 (100)  | 0 |
| Protein (g/L)                       | Screening                                        | 6               | 77.5  | 77.5  | 3.7   | 73   | 84                     | 0        | 6 (100)  | 0        | 2                                            | 71.5            | 71.5   | 6.4   | 67   | 76   | 0                      | 2 (100)  | 0 |
|                                     | Day -1                                           | 6               | 73.0  | 72.5  | 4.3   | 68   | 81                     | 0        | 6 (100)  | 0        | 2                                            | 72.5            | 72.5   | 6.4   | 68   | 77   | 0                      | 2 (100)  | 0 |
|                                     | Day 2                                            | 6               | 68.0  | 68.0  | 1.1   | 66   | 69                     | 0        | 6 (100)  | 0        | 2                                            | 66.0            | 66.0   | 12.7  | 57   | 75   | 1 (50.0)               | 1 (50.0) | 0 |
|                                     | Day 3                                            | 6               | 69.3  | 69.5  | 4.2   | 63   | 75                     | 1 (16.7) | 5 (83.3) | 0        | 2                                            | 68.0            | 68.0   | 0.0   | 68   | 68   | 0                      | 2 (100)  | 0 |
| Sodium (mmol/L)                     | Screening                                        | 6               | 137.7 | 137.0 | 2.5   | 135  | 142                    | 0        | 6 (100)  | 0        | 2                                            | 137.5           | 137.5  | 3.5   | 135  | 140  | 0                      | 2 (100)  | 0 |
|                                     | Day -1                                           | 6               | 137.2 | 138.0 | 2.7   | 133  | 140                    | 1 (16.7) | 5 (83.3) | 0        | 2                                            | 136.5           | 136.5  | 0.7   | 136  | 137  | 0                      | 2 (100)  | 0 |
|                                     | Day 29                                           | 5               | 139.0 | 140.0 | 3.2   | 134  | 142                    | 1 (16.7) | 4 (66.7) | 0        | 2                                            | 139.0           | 139.0  | 2.8   | 137  | 141  | 0                      | 2 (100)  | 0 |
| Urinary pH                          | Screening                                        | 6               | 6.75  | 6.75  | 0.69  | 6.0  | 7.5                    | 0        | 6 (100)  | 0        | 2                                            | 6.50            | 6.50   | 1.41  | 5.5  | 7.5  | 0                      | 2 (100)  | 0 |
|                                     | Day -1                                           | 6               | 7.08  | 7.00  | 1.07  | 6.0  | 8.5                    | 0        | 5 (83.3) | 1 (16.7) | 2                                            | 6.00            | 6.00   | 0.71  | 5.5  | 6.5  | 0                      | 2 (100)  | 0 |
| Urinary protein/creatinine (mg/mol) | Screening                                        | 6               | 12.2  | 10.0  | 3.7   | 10   | 19                     | 0        | 6 (100)  | 0        | 2                                            | 11.0            | 11.0   | 1.4   | 10   | 12   | 0                      | 2 (100)  | 0 |
|                                     | Day -1                                           | 6               | 12.8  | 10.0  | 5.6   | 10   | 24                     | 0        | 6 (100)  | 0        | 2                                            | 11.0            | 11.0   | 1.4   | 10   | 12   | 0                      | 2 (100)  | 0 |
|                                     | Day 8                                            | 6               | 16.7  | 10.0  | 11.5  | 10   | 38                     | 0        | 5 (83.3) | 1 (16.7) | 2                                            | 10.0            | 10.0   | 0.0   | 10   | 10   | 0                      | 2 (100)  | 0 |

**Figure S1** Individual participant values for Fridericia-corrected QT (QTcF).

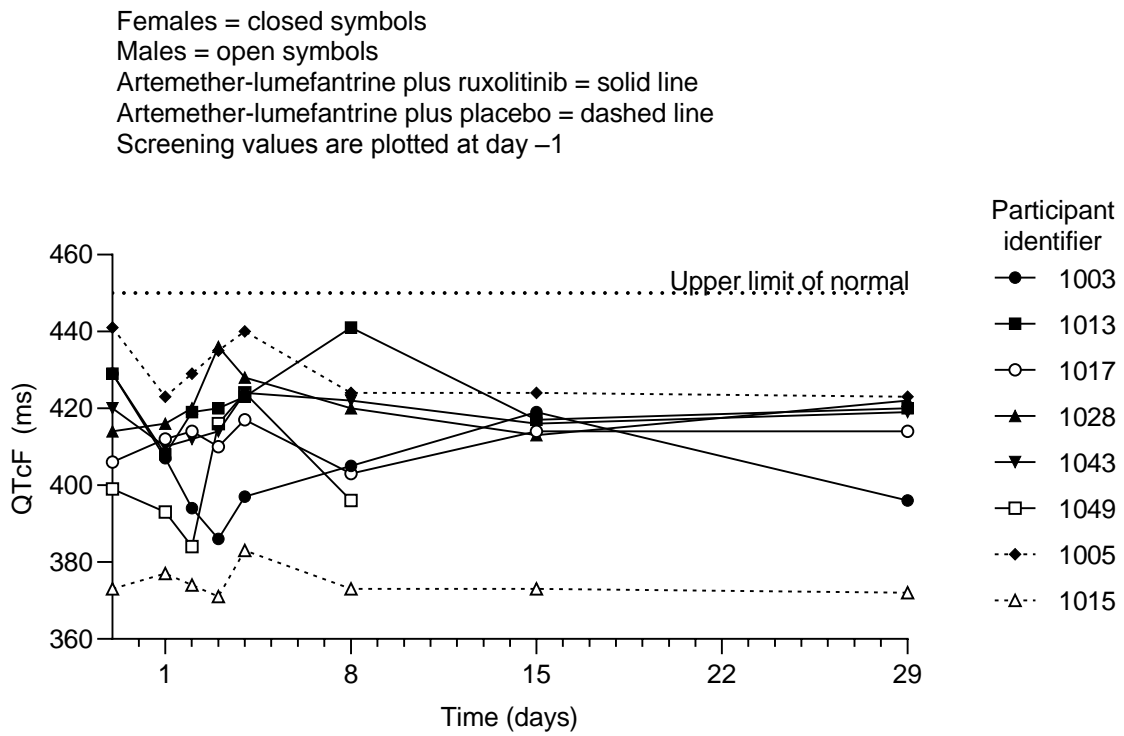

**Table S2** Post-hoc analysis comparing the change over time in  $T_{\max}$  and  $C_{\max}$  parameters within each treatment group assessed using Wilcoxon signed-rank test for  $T_{\max}$  or paired t-test of the  $\log_{10}$  transformed  $C_{\max}$  parameter, and summarized either as median (range) for  $T_{\max}$  or as the ratio of day 3 relative to day 1 presented as a percent and 95% confidence interval for  $C_{\max}$  (relative change).

| Analyte            | Parameter <sup>a</sup> | Artemether-lumefantrine plus | Day 1            | Day 3              | Relative change <sup>b</sup> (95% CI) | Test statistic | p value |
|--------------------|------------------------|------------------------------|------------------|--------------------|---------------------------------------|----------------|---------|
| Artemether         | $C_{\max}$             | Placebo ( $n = 2$ )          | 62.4 (7.3)       | 21.6 (2.9)         | 34.7 (23.5, 51.1)                     | $t_1 = -34.8$  | 0.018   |
|                    |                        | Ruxolitinib ( $n = 6$ )      | 71.2 (82.7)      | 9.01 (72.7)        | 12.6 (9.3, 17.1)                      | $t_5 = -17.5$  | <0.001  |
|                    | $T_{\max}$             | Placebo ( $n = 2$ )          | 2.44 (1.88–3.00) | 2.98 (1.92–4.03)   | 0.5 (–1.1, 2.2)                       | $Z = 0.45$     | 0.65    |
|                    |                        | Ruxolitinib ( $n = 6$ )      | 2.48 (0.98–3.05) | 2.89 (1.75–4.00)   | 0.8 (–0.1, 1.0)                       | $Z = 1.57$     | 0.12    |
| Dihydroartemisinin | $C_{\max}$             | Placebo ( $n = 2$ )          | 43.7 (20.0)      | 66.1 (3.7)         | 151 (18, 1260)                        | $t_1 = 2.48$   | 0.24    |
|                    |                        | Ruxolitinib ( $n = 6$ )      | 52.2 (25.4)      | 41.7 (28.5)        | 79.9 (59.4, 107.4)                    | $t_5 = -1.95$  | 0.11    |
|                    | $T_{\max}$             | Placebo ( $n = 2$ )          | 2.44 (1.88–3.00) | 2.98 (1.92–4.03)   | 0.5 (–1.1, 2.2)                       | $Z = 0.45$     | 0.65    |
|                    |                        | Ruxolitinib ( $n = 6$ )      | 3.00 (0.98–3.05) | 3.93 (1.75–4.00)   | 0.9 (–1.1, 1.0)                       | $Z = 0.95$     | 0.34    |
| Lumefantrine       | $C_{\max}$             | Placebo ( $n = 2$ )          | 5,090 (33.8)     | 7,890 (1.2)        | 155 (9, 2693)                         | $t_1 = 1.96$   | 0.30    |
|                    |                        | Ruxolitinib ( $n = 6$ )      | 3,510 (99.0)     | 10,500 (24.5)      | 300 (128, 704)                        | $t_5 = 3.31$   | 0.021   |
|                    | $T_{\max}$             | Placebo ( $n = 2$ )          | 6.01 (6.00–6.02) | 8.02 (4.00–12.00)  | 2.0 (–2.0, 6.0)                       | $Z = 0.45$     | 0.65    |
|                    |                        | Ruxolitinib ( $n = 6$ )      | 5.98 (5.00–6.00) | 12.00 (3.97–12.20) | 6.0 (–1.0, 7.2)                       | $Z = 1.99$     | 0.046   |

<sup>a</sup>  $C_{\max}$  (ng/mL), geometric mean (%CV) and  $T_{\max}$  (h), median (range)

<sup>b</sup> Change of day 3 pharmacokinetic parameter estimates compared to day 1, presented either as the median and range of the difference between day 3 and day 1 for  $T_{\max}$  parameters; or presented as the percentage change and 95% CI of pharmacokinetic parameter measured at day 3 relative to day 1.

**Table S3** Post-hoc analysis comparing pharmacokinetic parameters for artemether, dihydroartemisinin as an artemether metabolite, and lumefantrine following administration of artemether-lumefantrine with or without ruxolitinib. Differences between treatment groups were assessed using either the Kruskal-Wallis for  $T_{\max}$ , or two-sample t-test for  $\log_{10}$ -transformed  $C_{\max}$ , AUC, and half-life parameters.

| Analyte                      | Time     | Pharmacokinetic parameter                 | Artemether-lumefantrine plus ruxolitinib ( $n = 6$ ) | Artemether-lumefantrine plus placebo ( $n = 2$ ) | Test statistic     | p value            |
|------------------------------|----------|-------------------------------------------|------------------------------------------------------|--------------------------------------------------|--------------------|--------------------|
| Artemether                   | Days 1–3 | AUC <sub>0–t</sub> (ng·h/mL)              | 504 (40.5)                                           | 537 (5.0)                                        | $t_{5.44} = -0.40$ | 0.70 <sup>a</sup>  |
|                              | Day 1    | $T_{\max}$ (h)                            | 2.48 (0.98–3.05)                                     | 2.44 (1.88–3.00)                                 | $\chi_1^2 = 0.028$ | 0.87               |
|                              |          | $C_{\max}$ (ng/mL)                        | 71.2 (82.7)                                          | 62.4 (7.3)                                       | $t_6 = 0.24$       | 0.82               |
|                              |          | AUC <sub>0–8h</sub> (ng·h/mL)             | 201 (54.2)                                           | 195 (14.0)                                       | $t_6 = 0.08$       | 0.94               |
|                              | Day 3    | $T_{\max}$ (h)                            | 2.89 (1.75–4.00)                                     | 2.98 (1.92–4.03)                                 | $\chi_1^2 = 0.44$  | 0.51               |
|                              |          | $C_{\max}$ (ng/mL)                        | 9.01 (72.7)                                          | 21.6 (2.9)                                       | $t_{5.06} = -3.28$ | 0.021 <sup>a</sup> |
|                              |          | AUC <sub>0–12h</sub> (ng·h/mL)            | 53.4 (67.6)                                          | 86.5 (23.1)                                      | $t_{5.33} = -1.62$ | 0.16 <sup>a</sup>  |
| AUC <sub>0–t</sub> (ng·h/mL) |          | 732 (11.3)                                | 681 (13.2)                                           | $t_6 = 0.76$                                     | 0.48               |                    |
| Dihydroartemisinin           | Days 1–3 | AUC <sub>0–t</sub> (ng·h/mL)              | 732 (11.3)                                           | 681 (13.2)                                       | $t_6 = 0.76$       | 0.48               |
|                              | Day 1    | $T_{\max}$ (h)                            | 3.00 (0.98–3.05)                                     | 2.44 (1.88–3.00)                                 | $\chi_1^2 = 0.25$  | 0.62               |
|                              |          | $C_{\max}$ (ng/mL)                        | 52.2 (25.4)                                          | 43.7 (20.0)                                      | $t_6 = 0.89$       | 0.41               |
|                              |          | AUC <sub>0–8h</sub> (ng·h/mL)             | 172 (26.6)                                           | 138 (12.3)                                       | $t_6 = 1.09$       | 0.32               |
|                              | Day 3    | $T_{\max}$ (h)                            | 3.93 (1.75–4.00)                                     | 2.98 (1.92–4.03)                                 | $\chi_1^2 = 0.25$  | 0.62               |
|                              |          | $C_{\max}$ (ng/mL)                        | 41.7 (28.5)                                          | 66.1 (3.7)                                       | $t_6 = -2.21$      | 0.069              |
|                              |          | AUC <sub>0–12h</sub> (ng·h/mL)            | 185 (27.6)                                           | 235 (10.6)                                       | $t_6 = -1.17$      | 0.29               |
| AUC <sub>0–t</sub> (ng·h/mL) |          | 832,000 (23.4)                            | 712,000 (7.4)                                        | $t_6 = 0.90$                                     | 0.40               |                    |
| Lumefantrine                 | Days 1–3 | AUC <sub>0–∞</sub> (ng·h/mL) <sup>b</sup> | 828,000 (25.3)                                       | 731,000 (6.5)                                    | $t_5 = 0.66$       | 0.54               |
|                              | Day 1    | $t_{1/2}$ (h) <sup>b</sup>                | 196 (24.7)                                           | 197 (21.0)                                       | $t_5 = -0.04$      | 0.97               |
|                              |          | $T_{\max}$ (h)                            | 5.98 (5.00–6.00)                                     | 6.01 (6.00–6.02)                                 | $\chi_1^2 = 2.78$  | 0.096              |
|                              |          | $C_{\max}$ (ng/mL)                        | 3,510 (99.0)                                         | 5,090 (33.8)                                     | $t_6 = -0.59$      | 0.57               |
|                              | Day 3    | AUC <sub>0–8h</sub> (ng·h/mL)             | 13,100 (100.9)                                       | 19,300 (24.0)                                    | $t_6 = -0.63$      | 0.55               |
|                              |          | $T_{\max}$ (h)                            | 12.00 (3.97–12.20)                                   | 8.02 (4.00–12.00)                                | $\chi_1^2 = 0.44$  | 0.51               |



|                         |               |               |              |      |
|-------------------------|---------------|---------------|--------------|------|
| $C_{\max}$ (ng/mL)      | 10,500 (24.5) | 7,890 (1.2)   | $t_6 = 1.59$ | 0.16 |
| $AUC_{0-12h}$ (ng·h/mL) | 93,800 (37.1) | 69,500 (10.6) | $t_6 = 1.11$ | 0.31 |

<sup>a</sup> Results from a two-sample t-test assuming unequal variances after Levene's Test for Equal Variances was significant at the 5% level.

**Table S4** Post-hoc analysis comparing ruxolitinib pharmacokinetic parameters for the artemether-lumefantrine plus ruxolitinib group ( $n = 6$ ) between day 1 and day 3. Differences over the two time-points were compared non-parametrically using Wilcoxon signed-rank test, and differences of the  $\log_{10}$  parameters were compared using a paired t-test and summarized as the ratio of day 3 relative to day 1 and presented as a percent and 95% confidence interval.

| <b>Pharmacokinetic parameter</b>                                 | <b>Day 1</b>    | <b>Day 3</b>    | <b>Relative change (95% CI)<sup>a</sup></b> | <b>Test statistic</b> | <b>p value</b> |
|------------------------------------------------------------------|-----------------|-----------------|---------------------------------------------|-----------------------|----------------|
| $T_{\max}$ (h), median (range)                                   | 1.52 (0.98–2.0) | 1.98 (1.83–2.0) | 0.4% (–0.1, 1.0)                            | $z = 1.05$            | 0.29           |
| $C_{\max}$ (ng/mL), geometric mean (%CV) <sup>b</sup>            | 276 (32.7)      | 126 (24.3)      | 45.6% (33.7, 61.6)                          | $t_5 = -6.70$         | 0.001          |
| AUC <sub>0–6h</sub> (ng·h/mL), geometric mean (%CV) <sup>b</sup> | 839 (20.8)      | 509 (34.2)      | 60.6% (46.2, 79.5)                          | $t_5 = -4.75$         | 0.005          |

<sup>a</sup> Change of day 3 pharmacokinetic parameter estimates compared to day 1, presented as the ratio and 95% CI of day 3 relative to day 1.

<sup>b</sup> Parametric analyses calculated on the  $\log_{10}$  transformed values of the parameter.
